# Supplementary material for: HCLIM38: a flexible regional climate model applicable for different climate zones from coarse to convection-permitting scales
Source: Copernicus journal article supplement (doi:10.5194/gmd-13-1311-2020), 2020-03-20
Supplement: Supplementary file 2 [file gmd-13-1311-2020-supplement.zip]

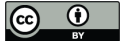

## *Supplement of*

# **HCLIM38: a flexible regional climate model applicable for different climate zones from coarse to convection-permitting scales**

**Danijel Belušić et al.**

*Correspondence to:* Danijel Belušić ([danijel.belusic@smhi.se](mailto:danijel.belusic@smhi.se))

- [gmd-13-1311-2020-supplement-title-page.pdf](#)
- [Harmonie\\_domains.pm](#)
- [SupplementaryMaterial.pdf](#)
- [config\\_exp.h](#)

The copyright of individual parts of the supplement might differ from the CC BY 4.0 License.
